# Supplementary material for: RegenHeart: A Time-Effective, Low-Concentration, Detergent-Based Method Aiming for Conservative Decellularization of the Whole Heart Organ
Source: PubMed Central journal article supplement (PMC8011801; doi:10.1021/acsbiomaterials.0c00540), 2020-08-20
Supplement: ab0c00540_si_001.pdf [file ab0c00540_si_001.pdf]

RegenHeart: a time-effective, low-concentration detergent-based method aiming for conservative decellularization of the whole heart organ

Eleonora Dal Sasso<sup>1, ‡</sup>, Roberta Menabò<sup>2, 3, ‡</sup>, Davide Agrillo<sup>1</sup>, Giorgio Arrigoni<sup>3</sup>, Cinzia Franchin<sup>3</sup>, Chiara Giraudò<sup>4, 5</sup>, Andrea Filippi<sup>6, 7, 8</sup>, Giulia Borile<sup>6, 8</sup>, Guido Ascione<sup>1</sup>, Fabio Zanella<sup>9</sup>, Assunta Fabozzo<sup>5, 9</sup>, Raffaella Motta<sup>4</sup>, Filippo Romanato<sup>5, 6, 8</sup>, Di Lisa Fabio<sup>2, 3</sup>, Laura Iop<sup>1, 5, +, \*</sup>, and Gino Gerosa<sup>1, 5, 9, +</sup>

<sup>1</sup> Cardiovascular Regenerative Medicine, Department of Cardiac Thoracic Vascular Sciences and Public Health, University of Padua, Padua, Italy;

<sup>2</sup> Institute of Neuroscience, National Research Council (CNR), Padua, Italy;

<sup>3</sup> Department of Biomedical Sciences, University of Padua, Padua, Italy

<sup>4</sup> Department of Medicine, University of Padua, Padua, Italy

<sup>5</sup> L.I.F.E.L.A.B. Program, Consorzio per la Ricerca sanitaria (CORIS), Veneto Region, Padua, Italy;

<sup>6</sup> Department of Physics and Astronomy 'G. Galilei', University of Padua, Padua, Italy.

<sup>7</sup> Fondazione Bruno Kessler, Trento, Italy.

<sup>8</sup> Institute of Pediatric Research 'Città della Speranza', Padua, Italy

<sup>9</sup> Cardiac Surgery Unit, University Hospital of Padua, Padua, Italy

Number of pages: 11

Number of tables: 1 (Table S1)

**Table S1: Complete protein dataset identified by proteomic analysis**

| Accession | Description                                                                      | Score  | Coverage   | # Proteins       | # Unique Peptides        | # Peptides                               | # PSMs      | # AAs   | MW [kDa] | calc. pI |           |        |            |                  |          |                    |
|-----------|----------------------------------------------------------------------------------|--------|------------|------------------|--------------------------|------------------------------------------|-------------|---------|----------|----------|-----------|--------|------------|------------------|----------|--------------------|
| F1LTJ5    | Protein Hspg2<br>OS=Rattus norvegicus<br>GN=Hspg2<br>PE=4<br>SV=2 - [F1LTJ5_RAT] | 742,73 | 19,24      | 1                | 19                       | 27                                       | 35          | 2001    | 216,3    | 5,67     |           |        |            |                  |          |                    |
| A2        | Sequence                                                                         | # PSMs | # Proteins | # Protein Groups | Protein Group Accessions | Modifications                            | $\Delta Cn$ | q-Value | PEP      | IonScore | Exp Value | Charge | MH+ [Da]   | $\Delta M$ [ppm] | RT [min] | # Missed Cleavages |
| High      | SPAYTLWVTR                                                                       | 1      | 2          | 2                | F1M566;F1LTJ5            |                                          | 0,0000      | 0       | 0,06     | 78       | 1,48E-07  | 2      | 1193,63176 | 0,33             | 28,02    | 0                  |
| High      | EVSEAVVEKLETEYVK                                                                 | 2      | 1          | 1                | F1LTJ5                   |                                          | 0,0000      | 0       | 0,12     | 64       | 3,32E-06  | 2      | 1851,95720 | -0,80            | 29,95    | 1                  |
| High      | LPAIEPSDQGQYLcR                                                                  | 2      | 2          | 2                | F1M566;F1LTJ5            | C14(Carbamidomethyl)                     | 0,0000      | 0       | 0,08     | 63       | 4,86E-06  | 2      | 1746,85063 | 1,50             | 25,59    | 0                  |
| High      | SIEYSPQLEDANAK                                                                   | 1      | 1          | 1                | F1LTJ5                   |                                          | 0,0000      | 0       | 0,14     | 61       | 6,23E-06  | 2      | 1564,74944 | 0,28             | 21,53    | 0                  |
| High      | AEmLQALASLEAVLLQTVYNTK                                                           | 1      | 1          | 1                | F1LTJ5                   | M3(Oxidation)                            | 0,0000      | 0       | 0,1      | 59       | 6,11E-06  | 3      | 2422,29032 | 0,17             | 47,14    | 0                  |
| High      | AELLVAEAPSKPITVTVEEQR                                                            | 1      | 2          | 2                | F1M566;F1LTJ5            |                                          | 0,0000      | 0       | 0,03     | 54       | 1,68E-05  | 3      | 2280,24479 | 0,05             | 27,70    | 0                  |
| High      | mTSVGLSDIVmDTTVTYTTIHGR                                                          | 1      | 1          | 1                | F1LTJ5                   | M1(Oxidation); M11(Oxidation)            | 0,0000      | 0       | 0,09     | 53       | 3,69E-05  | 3      | 2530,21909 | 1,03             | 32,92    | 0                  |
| High      | GmVFGIPDGVLELVQQR                                                                | 3      | 1          | 1                | F1LTJ5                   | M2(Oxidation)                            | 0,0000      | 0       | 0,07     | 51       | 8,06E-05  | 2      | 1842,98015 | 0,98             | 38,34    | 0                  |
| High      | LSGISmDVAVPENTGQDPAR                                                             | 1      | 1          | 1                | F1LTJ5                   | M6(Oxidation)                            | 0,0000      | 0       | 0,15     | 48       | 0,000118  | 2      | 2072,99394 | 1,02             | 23,92    | 0                  |
| High      | IPGDQIVSVVFIK                                                                    | 2      | 1          | 1                | F1LTJ5                   |                                          | 0,0000      | 0       | 0,15     | 47       | 6,32E-05  | 3      | 1414,82993 | -0,40            | 34,52    | 0                  |
| High      | LNFDPQPSDFK                                                                      | 1      | 1          | 1                | F1LTJ5                   |                                          | 0,0000      | 0       | 0,25     | 43       | 0,000348  | 2      | 1210,57500 | 0,88             | 24,66    | 0                  |
| High      | ScNEcSEGSFHLSK                                                                   | 1      | 1          | 1                | F1LTJ5                   | C2(Carbamidomethyl); C5(Carbamidomethyl) | 0,0000      | 0       | 0,22     | 39       | 0,000119  | 3      | 1641,66281 | -0,26            | 17,63    | 0                  |

|      |                        |   |   |   |               |                                                                |        |   |      |    |          |   |            |       |       |   |
|------|------------------------|---|---|---|---------------|----------------------------------------------------------------|--------|---|------|----|----------|---|------------|-------|-------|---|
| High | AAGVPSASITWR           | 1 | 2 | 2 | F1M566;F1LTJ5 |                                                                | 0,0000 | 0 | 0,25 | 38 | 0,002495 | 2 | 1215,64824 | 0,11  | 24,52 | 0 |
| High | RFLVHDAFWALPK          | 1 | 1 | 1 | F1LTJ5        |                                                                | 0,0000 | 0 | 0,22 | 38 | 0,000904 | 3 | 1599,87979 | 0,17  | 29,02 | 1 |
| High | FLVHDAFWALPK           | 1 | 1 | 1 | F1LTJ5        |                                                                | 0,0000 | 0 | 0,21 | 37 | 0,001983 | 3 | 1443,77781 | -0,41 | 32,32 | 0 |
| High | ALSSAGQHVVR            | 1 | 2 | 2 | F1M566;F1LTJ5 |                                                                | 0,0000 | 0 | 0,39 | 36 | 0,001487 | 3 | 1124,61811 | 0,87  | 14,59 | 0 |
| High | SQSVRPGADVTFIC TAK     | 1 | 2 | 2 | F1M566;F1LTJ5 | C14(Carbamidomethyl)                                           | 0,0000 | 0 | 0,13 | 36 | 0,002418 | 3 | 1836,92539 | -1,07 | 22,50 | 0 |
| High | LETEYVK                | 1 | 1 | 1 | F1LTJ5        |                                                                | 0,0000 | 0 | 0,35 | 36 | 0,002108 | 2 | 881,46239  | 1,01  | 17,28 | 0 |
| High | GHTPTHGALNQR           | 2 | 1 | 1 | F1LTJ5        |                                                                | 0,0000 | 0 | 0,42 | 36 | 0,002974 | 3 | 1385,70179 | -1,11 | 12,74 | 0 |
| High | ATATAcRPePcPYIDASQR    | 1 | 1 | 1 | F1LTJ5        | C6(Carbamidomethyl); C9(Carbamidomethyl); C11(Carbamidomethyl) | 0,0000 | 0 | 0,21 | 32 | 0,002308 | 3 | 2194,97916 | 0,01  | 19,58 | 0 |
| High | GmLEPVQKPDVILVGA GYR   | 1 | 1 | 1 | F1LTJ5        | M2(Oxidation)                                                  | 0,0000 | 0 | 0,14 | 31 | 0,005688 | 3 | 2058,10654 | 0,59  | 27,51 | 0 |
| High | VASGLYLGTcER           | 1 | 1 | 1 | F1LTJ5        | C10(Carbamidomethyl)                                           | 0,0000 | 0 | 0,18 | 29 | 0,012383 | 2 | 1325,65105 | -0,62 | 21,66 | 0 |
| High | AmLQVHGGSGPR           | 1 | 2 | 2 | F1M566;F1LTJ5 | M2(Oxidation)                                                  | 0,0000 | 0 | 0,24 | 29 | 0,013767 | 3 | 1225,61130 | 0,50  | 14,13 | 0 |
| High | VTSYGGELR              | 1 | 1 | 1 | F1LTJ5        |                                                                | 0,0000 | 0 | 0,43 | 29 | 0,016641 | 2 | 981,50163  | 1,64  | 17,35 | 0 |
| High | QLISTHFAPGDFQGFALVNPQR | 3 | 1 | 1 | F1LTJ5        |                                                                | 0,0000 | 0 | 0,23 | 24 | 0,02766  | 3 | 2443,25241 | 0,25  | 34,39 | 0 |
| High | SVVPQGGPHSLR           | 1 | 2 | 2 | F1M566;F1LTJ5 |                                                                | 0,0000 | 0 | 0,43 | 23 | 0,042849 | 3 | 1233,67096 | 0,86  | 17,23 | 0 |
| High | QVQLSEEHWHESGRPVQR     | 1 | 1 | 1 | F1LTJ5        |                                                                | 0,0000 | 0 | 0,3  | 12 | 0,462705 | 4 | 2301,14809 | -0,13 | 19,65 | 0 |

P02454

|                                                                                           |        |      |   |   |   |    |      |       |      |
|-------------------------------------------------------------------------------------------|--------|------|---|---|---|----|------|-------|------|
| Collagen alpha-1(I) chain<br>OS=Rattus norvegicus<br>GN=Col1a1 PE=1<br>SV=5 - [CO1A1_RAT] | 402,81 | 6,81 | 1 | 8 | 8 | 11 | 1453 | 137,9 | 5,92 |
|-------------------------------------------------------------------------------------------|--------|------|---|---|---|----|------|-------|------|

| A2   | Sequence           | # PSMs | # Proteins | # Protein Groups | Protein Group Accessions | Modifications | ΔCn    | q-Value | PEP  | IonScore | Exp Value | Charge | MH+ [Da]   | ΔM [ppm] | RT [min] | # Missed Cleavages |
|------|--------------------|--------|------------|------------------|--------------------------|---------------|--------|---------|------|----------|-----------|--------|------------|----------|----------|--------------------|
| High | GETGPAGPAGPIGPAGAR | 1      | 1          | 1                | P02454                   |               | 0,0000 | 0       | 0,02 | 90       | 9,06E-09  | 2      | 1532,78325 | 1,02     | 19,70    | 0                  |

|            |                                                                                                                  |                                |            |                     |                                |                              |                    |         |       |          |           |          |                |                |          |                       |   |
|------------|------------------------------------------------------------------------------------------------------------------|--------------------------------|------------|---------------------|--------------------------------|------------------------------|--------------------|---------|-------|----------|-----------|----------|----------------|----------------|----------|-----------------------|---|
|            | High                                                                                                             | NGDRGETG<br>PAGPAGPI<br>GPAGAR | 2          | 1                   | 1                              | P02454                       |                    | 0,0000  | 0     | 0,03     | 72        | 5,44E-07 | 2              | 1974,9766<br>1 | 1,24     | 18,26                 | 1 |
|            | High                                                                                                             | GETGPSGP<br>AGPTGAR            | 1          | 1                   | 1                              | P02454                       |                    | 0,0000  | 0     | 0,06     | 70        | 9,24E-07 | 2              | 1311,6303<br>0 | 1,10     | 14,90                 | 0 |
|            | High                                                                                                             | DGEAGAQG<br>APGPAGPA<br>GER    | 1          | 1                   | 1                              | P02454                       |                    | 0,0000  | 0     | 0,05     | 68        | 1,01E-06 | 2              | 1664,7629<br>9 | 0,34     | 16,56                 | 0 |
|            | High                                                                                                             | SAGVSVPG<br>PmGPSGPR           | 2          | 1                   | 1                              | P02454                       | M10<br>(Oxidation) | 0,0000  | 0     | 0,12     | 56        | 1,73E-05 | 3              | 1468,7208<br>9 | -0,34    | 19,67                 | 0 |
|            | High                                                                                                             | GPAGPQGP<br>R                  | 2          | 1                   | 1                              | P02454                       |                    | 0,0000  | 0     | 0,14     | 46        | 0,000201 | 2              | 836,43791      | 0,64     | 12,83                 | 0 |
|            | High                                                                                                             | GSEGPQGV<br>R                  | 1          | 1                   | 1                              | P02454                       |                    | 0,0000  | 0     | 0,38     | 39        | 0,00089  | 2              | 886,43779      | 0,02     | 13,24                 | 0 |
|            | High                                                                                                             | GFSGLDGA<br>K                  | 1          | 1                   | 1                              | P02454                       |                    | 0,0000  | 0     | 0,26     | 38        | 0,001526 | 2              | 851,42571      | -0,12    | 19,23                 | 0 |
| F1M<br>566 | Protein<br>Hspg2<br>(Fragment<br>)<br>OS=Rattus<br>norvegicus<br>GN=Hspg<br>2 PE=4<br>SV=2 -<br>[F1M566_<br>RAT] | 397,78                         | 9,65       | 1                   | 6                              | 14                           | 16                 | 2165    | 230,7 | 6,95     |           |          |                |                |          |                       |   |
| A2         | Sequence                                                                                                         | # PSMs                         | # Proteins | # Protein<br>Groups | Protein<br>Group<br>Accessions | Modificatio<br>ns            | ΔCn                | q-Value | PEP   | IonScore | Exp Value | Charge   | MH+ [Da]       | ΔM [ppm]       | RT [min] | # Missed<br>Cleavages |   |
| High       | SPAYTLVW<br>TR                                                                                                   | 1                              | 2          | 2                   | F1M566;F1<br>LTJ5              |                              | 0,0000             | 0       | 0,06  | 78       | 1,48E-07  | 2        | 1193,6317<br>6 | 0,33           | 28,02    | 0                     |   |
| High       | ITVPASEGS<br>SYR                                                                                                 | 1                              | 1          | 1                   | F1M566                         |                              | 0,0000             | 0       | 0,13  | 66       | 2,45E-06  | 2        | 1266,6332<br>3 | 0,57           | 19,19    | 0                     |   |
| High       | LPAIEPSDQ<br>GQYLcR                                                                                              | 2                              | 2          | 2                   | F1M566;F1<br>LTJ5              | C14(Carba<br>midomethyl<br>) | 0,0000             | 0       | 0,08  | 63       | 4,86E-06  | 2        | 1746,8506<br>3 | 1,50           | 25,59    | 0                     |   |
| High       | AELLVAEAP<br>SKPITVTVE<br>EQR                                                                                    | 1                              | 2          | 2                   | F1M566;F1<br>LTJ5              |                              | 0,0000             | 0       | 0,03  | 54       | 1,68E-05  | 3        | 2280,2447<br>9 | 0,05           | 27,70    | 0                     |   |
| High       | SGIVQSGS<br>VIR                                                                                                  | 1                              | 1          | 1                   | F1M566                         |                              | 0,0000             | 0       | 0,15  | 54       | 4,2E-05   | 2        | 1102,6217<br>5 | 0,18           | 19,63    | 0                     |   |
| High       | IAHVELADA<br>GQYR                                                                                                | 1                              | 1          | 1                   | F1M566                         |                              | 0,0000             | 0       | 0,18  | 44       | 0,000403  | 3        | 1442,7403<br>3 | 1,12           | 21,00    | 0                     |   |
| High       | SPVISIEPP<br>SSTVQQGQ<br>DASFK                                                                                   | 1                              | 1          | 1                   | F1M566                         |                              | 0,0000             | 0       | 0,14  | 43       | 0,000447  | 3        | 2302,1562<br>8 | 0,02           | 27,99    | 0                     |   |
| High       | AAGVPSASI<br>TWR                                                                                                 | 1                              | 2          | 2                   | F1M566;F1<br>LTJ5              |                              | 0,0000             | 0       | 0,25  | 38       | 0,002495  | 2        | 1215,6482<br>4 | 0,11           | 24,52    | 0                     |   |
| High       | ALSSAGQH<br>VVR                                                                                                  | 1                              | 2          | 2                   | F1M566;F1<br>LTJ5              |                              | 0,0000             | 0       | 0,39  | 36       | 0,001487  | 3        | 1124,6181<br>1 | 0,87           | 14,59    | 0                     |   |

|            | High                                                                                             | SQSVRPGA<br>DVTfIcTAK             | 1          | 2                   | 2                              | F1M566;F1<br>LTJ5                                                              | C14(Carba<br>midomethyl<br>) | 0,0000  | 0     | 0,13     | 36        | 0,002418 | 3              | 1836,9253<br>9 | -1,07    | 22,50                 | 0 |
|------------|--------------------------------------------------------------------------------------------------|-----------------------------------|------------|---------------------|--------------------------------|--------------------------------------------------------------------------------|------------------------------|---------|-------|----------|-----------|----------|----------------|----------------|----------|-----------------------|---|
|            | High                                                                                             | IASVKPSDA<br>GTYYcQAQ<br>NALGTAQK | 1          | 1                   | 1                              | F1M566                                                                         | C14(Carba<br>midomethyl<br>) | 0,0000  | 0     | 0,12     | 33        | 0,003517 | 3              | 2578,2939<br>8 | 0,35     | 27,83                 | 0 |
|            | High                                                                                             | AmLQVHG<br>GSGPR                  | 1          | 2                   | 2                              | F1M566;F1<br>LTJ5                                                              | M2(Oxidati<br>on)            | 0,0000  | 0     | 0,24     | 29        | 0,013767 | 3              | 1225,6113<br>0 | 0,50     | 14,13                 | 0 |
|            | High                                                                                             | SVVPQGGP<br>HSLR                  | 1          | 2                   | 2                              | F1M566;F1<br>LTJ5                                                              |                              | 0,0000  | 0     | 0,43     | 23        | 0,042849 | 3              | 1233,6709<br>6 | 0,86     | 17,23                 | 0 |
|            | High                                                                                             | GGSLPAGH<br>QVHGHLR               | 2          | 1                   | 1                              | F1M566                                                                         |                              | 0,0000  | 0     | 0,3      | 15        | 0,234476 | 4              | 1635,8836<br>9 | 0,60     | 15,77                 | 0 |
| F1M<br>A59 | Protein<br>Col4a1<br>OS=Rattus<br>norvegicus<br>GN=Col4a<br>1 PE=4<br>SV=1 -<br>[F1MA59_<br>RAT] | 334,39                            | 5,81       | 1                   | 6                              | 6                                                                              | 11                           | 1669    | 160,5 | 8,29     |           |          |                |                |          |                       |   |
| A2         | Sequence                                                                                         | # PSMs                            | # Proteins | # Protein<br>Groups | Protein<br>Group<br>Accessions | Modificatio<br>ns                                                              | ΔCn                          | q-Value | PEP   | IonScore | Exp Value | Charge   | MH+ [Da]       | ΔM [ppm]       | RT [min] | # Missed<br>Cleavages |   |
| High       | HSQTDDP<br>LcPPGTK                                                                               | 2                                 | 1          | 1                   | F1MA59                         | C10(Carba<br>midomethyl<br>)                                                   | 0,0000                       | 0       | 0,02  | 72       | 3,41E-07  | 2        | 1653,7550<br>5 | 0,77           | 17,35    | 0                     |   |
| High       | FSTmPFLFc<br>NINNVcNF<br>ASR                                                                     | 4                                 | 1          | 1                   | F1MA59                         | M4(Oxidati<br>on);<br>C9(Carbami<br>domethyl);<br>C15(Carba<br>midomethyl<br>) | 0,0000                       | 0       | 0,07  | 71       | 3,17E-07  | 2        | 2455,1077<br>1 | 3,44           | 36,06    | 0                     |   |
| High       | AHGQDLGT<br>AGScLR                                                                               | 2                                 | 1          | 1                   | F1MA59                         | C12(Carba<br>midomethyl<br>)                                                   | 0,0000                       | 0       | 0,07  | 55       | 1,89E-05  | 2        | 1442,6810<br>8 | 0,36           | 16,47    | 0                     |   |
| High       | NDYSYWLS<br>TPEPmPmS<br>mAPISGDN<br>IRPFISR                                                      | 1                                 | 1          | 1                   | F1MA59                         | M13(Oxidat<br>ion);<br>M15(Oxidat<br>ion);<br>M17(Oxidat<br>ion)               | 0,0000                       | 0       | 0,4   | 52       | 1,81E-05  | 3        | 3620,6495<br>1 | -0,03          | 33,43    | 0                     |   |
| High       | KFSTmPFLF<br>cNINNVcNF<br>ASR                                                                    | 1                                 | 1          | 1                   | F1MA59                         | M5(Oxidati<br>on);<br>C10(Carba<br>midomethyl<br>C16(Carba<br>midomethyl<br>)  | 0,0000                       | 0       | 0,44  | 44       | 0,000183  | 3        | 2583,1984<br>6 | 1,63           | 33,44    | 1                     |   |
| High       | ILYHGYSLL<br>YVQGNR                                                                              | 1                                 | 1          | 1                   | F1MA59                         |                                                                                | 0,0000                       | 0       | 0,2   | 38       | 0,001474  | 3        | 1924,9917<br>9 | 0,10           | 27,15    | 0                     |   |

|        |                                                                                         |        |      |   |   |   |   |      |       |      |
|--------|-----------------------------------------------------------------------------------------|--------|------|---|---|---|---|------|-------|------|
| F1LS40 | Collagen alpha-2(I) chain<br>OS=Rattus norvegicus<br>GN=Col1a2 PE=4 SV=2 - [F1LS40_RAT] | 246,08 | 4,52 | 2 | 6 | 6 | 7 | 1372 | 129,8 | 9,22 |
|--------|-----------------------------------------------------------------------------------------|--------|------|---|---|---|---|------|-------|------|

| A2   | Sequence         | # PSMs | # Proteins | # Protein Groups | Protein Group Accessions | Modifications                 | ΔCn    | q-Value | PEP  | IonScore | Exp Value | Charge | MH+ [Da]   | ΔM [ppm] | RT [min] | # Missed Cleavages |
|------|------------------|--------|------------|------------------|--------------------------|-------------------------------|--------|---------|------|----------|-----------|--------|------------|----------|----------|--------------------|
| High | GVSAGP mGLmGPR   | 1      | 2          | 1                | F1LS40                   | M9(Oxidation); M12(Oxidation) | 0,0000 | 0       | 0,05 | 84       | 3,2E-08   | 2      | 1415,67815 | 0,75     | 19,04    | 0                  |
| High | GEAGAAGP SGPAGPR | 1      | 2          | 1                | F1LS40                   |                               | 0,0000 | 0       | 0,04 | 68       | 1,67E-06  | 2      | 1251,60967 | 1,55     | 14,58    | 0                  |
| High | GPAGPSGPI GK     | 1      | 2          | 1                | F1LS40                   |                               | 0,0000 | 0       | 0,09 | 53       | 3,66E-05  | 2      | 937,50963  | -0,63    | 15,44    | 0                  |
| High | GPAGPSGPI GKDGR  | 1      | 2          | 1                | F1LS40                   |                               | 0,0000 | 0       | 0,12 | 52       | 7,88E-05  | 2      | 1265,66069 | 0,74     | 14,86    | 1                  |
| High | GPSGPQGI R       | 1      | 2          | 1                | F1LS40                   |                               | 0,0000 | 0       | 0,21 | 46       | 0,000251  | 2      | 868,46379  | 0,23     | 14,77    | 0                  |
| High | GVVGPQGA R       | 2      | 2          | 1                | F1LS40                   |                               | 0,0000 | 0       | 0,24 | 39       | 0,00134   | 2      | 840,46861  | -0,08    | 15,30    | 0                  |

|        |                                                                              |        |      |   |   |   |   |      |       |      |
|--------|------------------------------------------------------------------------------|--------|------|---|---|---|---|------|-------|------|
| F1M6Q3 | Protein Col4a2<br>OS=Rattus norvegicus<br>GN=Col4a2 PE=4 SV=2 - [F1M6Q3_RAT] | 165,72 | 5,38 | 1 | 6 | 6 | 6 | 1690 | 166,1 | 8,65 |
|--------|------------------------------------------------------------------------------|--------|------|---|---|---|---|------|-------|------|

| A2   | Sequence                       | # PSMs | # Proteins | # Protein Groups | Protein Group Accessions | Modifications                  | ΔCn    | q-Value | PEP  | IonScore | Exp Value | Charge | MH+ [Da]   | ΔM [ppm] | RT [min] | # Missed Cleavages |
|------|--------------------------------|--------|------------|------------------|--------------------------|--------------------------------|--------|---------|------|----------|-----------|--------|------------|----------|----------|--------------------|
| High | GLDGFQGP SGPR                  | 1      | 1          | 1                | F1M6Q3                   |                                | 0,0000 | 0       | 0,07 | 69       | 1,12E-06  | 2      | 1187,58147 | 0,87     | 21,25    | 0                  |
| High | LWSGYSLL YFEGQEK               | 1      | 1          | 1                | F1M6Q3                   |                                | 0,0000 | 0       | 0,16 | 61       | 9,39E-06  | 2      | 1819,89031 | 0,07     | 35,35    | 0                  |
| High | SVSIGYLLV K                    | 1      | 1          | 1                | F1M6Q3                   |                                | 0,0000 | 0       | 0,12 | 58       | 1,93E-06  | 2      | 1078,65056 | -0,14    | 30,14    | 0                  |
| High | AHNQDLGL AGSCLAR               | 1      | 1          | 1                | F1M6Q3                   | C12(Carbamidomethyl)           | 0,0000 | 0       | 0,39 | 30       | 0,008916  | 3      | 1582,77390 | -1,03    | 20,72    | 0                  |
| High | IAVQP GTm GPQGR                | 1      | 1          | 1                | F1M6Q3                   | M8(Oxidation)                  | 0,0000 | 0       | 0,35 | 27       | 0,019706  | 2      | 1327,67888 | 0,08     | 16,81    | 0                  |
| High | SYWLS TTA PLPmmPVA EEEIKPYIS R | 1      | 1          | 1                | F1M6Q3                   | M12(Oxidation); M13(Oxidation) | 0,0000 | 0       | 0,36 | 12       | 0,270528  | 3      | 3041,50284 | 0,94     | 33,64    | 0                  |

|        |                                                                                                 |        |            |                  |                          |                                                                |             |         |       |          |           |        |            |                  |          |                    |  |
|--------|-------------------------------------------------------------------------------------------------|--------|------------|------------------|--------------------------|----------------------------------------------------------------|-------------|---------|-------|----------|-----------|--------|------------|------------------|----------|--------------------|--|
| P02770 | Serum albumin<br>OS=Rattus norvegicus<br>GN=Alb<br>PE=1<br>SV=2 - [ALBU_RAT]                    | 159,18 | 4,93       | 1                | 4                        | 4                                                              | 6           | 608     | 68,7  | 6,48     |           |        |            |                  |          |                    |  |
| A2     | Sequence                                                                                        | # PSMs | # Proteins | # Protein Groups | Protein Group Accessions | Modifications                                                  | $\Delta$ Cn | q-Value | PEP   | IonScore | Exp Value | Charge | MH+ [Da]   | $\Delta$ M [ppm] | RT [min] | # Missed Cleavages |  |
| High   | EccHGDLLCADDR                                                                                   | 2      | 1          | 1                | P02770                   | C2(Carbamidomethyl); C3(Carbamidomethyl); C10(Carbamidomethyl) | 0,0000      | 0       | 0,02  | 79       | 1,3E-08   | 2      | 1749,66460 | 1,13             | 19,30    | 0                  |  |
| High   | LcVLHEK                                                                                         | 2      | 1          | 1                | P02770                   | C2(Carbamidomethyl)                                            | 0,0000      | 0       | 0,32  | 36       | 0,002266  | 2      | 898,48137  | -0,18            | 16,81    | 0                  |  |
| High   | TPVSEKVTK                                                                                       | 1      | 1          | 1                | P02770                   |                                                                | 0,0000      | 0       | 0,34  | 35       | 0,002245  | 3      | 988,56772  | 0,34             | 13,03    | 1                  |  |
| High   | LcVLHEKTPVSEK                                                                                   | 1      | 1          | 1                | P02770                   | C2(Carbamidomethyl)                                            | 0,0000      | 0       | 0,32  | 25       | 0,025259  | 3      | 1539,82083 | 0,54             | 17,74    | 1                  |  |
| D4A115 | Protein Col6a3<br>OS=Rattus norvegicus<br>GN=Col6a3<br>PE=4<br>SV=2 - [D4A115_RAT]              | 161,83 | 1,67       | 2                | 2                        | 2                                                              | 3           | 2211    | 240,0 | 6,38     |           |        |            |                  |          |                    |  |
| A2     | Sequence                                                                                        | # PSMs | # Proteins | # Protein Groups | Protein Group Accessions | Modifications                                                  | $\Delta$ Cn | q-Value | PEP   | IonScore | Exp Value | Charge | MH+ [Da]   | $\Delta$ M [ppm] | RT [min] | # Missed Cleavages |  |
| High   | SALLDSIQNLQVALTSK                                                                               | 2      | 2          | 1                | D4A115                   |                                                                | 0,0000      | 0       | 0,25  | 93       | 1,65E-09  | 2      | 1801,01055 | 2,17             | 38,57    | 0                  |  |
| High   | LNLDDLDEYLAQLDNIAEK                                                                             | 1      | 2          | 1                | D4A115                   |                                                                | 0,0000      | 0       | 0,46  | 17       | 0,13875   | 3      | 2332,19162 | -0,14            | 45,45    | 0                  |  |
| F1LPD0 | Protein Col15a1 (Fragment)<br>OS=Rattus norvegicus<br>GN=Col15a1<br>PE=1<br>SV=2 - [F1LPD0_RAT] | 149,06 | 5,70       | 1                | 5                        | 5                                                              | 5           | 1334    | 137,0 | 4,91     |           |        |            |                  |          |                    |  |

| A2     | Sequence                                                                                            | # PSMs                            | # Proteins | # Protein Groups | Protein Group Accessions | Modifications | ΔCn                           | q-Value | PEP   | IonScore | Exp Value | Charge   | MH+ [Da] | ΔM [ppm]   | RT [min] | # Missed Cleavages |   |
|--------|-----------------------------------------------------------------------------------------------------|-----------------------------------|------------|------------------|--------------------------|---------------|-------------------------------|---------|-------|----------|-----------|----------|----------|------------|----------|--------------------|---|
|        | High                                                                                                | NLVTALSDmGDmLQK                   | 1          | 1                | 1                        | F1LPD0        | M9(Oxidation); M12(Oxidation) | 0,0000  | 0     | 0,16     | 96        | 2,39E-09 | 2        | 1667,79924 | 0,76     | 27,53              | 0 |
|        | High                                                                                                | SSRPLTFEP<br>SAGIFVGN<br>AGATGLER | 1          | 1                | 1                        | F1LPD0        |                               | 0,0000  | 0     | 0,03     | 54        | 1,56E-05 | 3        | 2534,30326 | 1,32     | 30,60              | 0 |
|        | High                                                                                                | VVWHGSN<br>PHGVR                  | 1          | 1                | 1                        | F1LPD0        |                               | 0,0000  | 0     | 0,18     | 28        | 0,017313 | 4        | 1344,69289 | 0,64     | 14,62              | 0 |
|        | High                                                                                                | FSLPIVNLK                         | 1          | 1                | 1                        | F1LPD0        |                               | 0,0000  | 0     | 0,43     | 26        | 0,00578  | 2        | 1030,63017 | 0,57     | 32,47              | 0 |
|        | High                                                                                                | FTGSIQQLI<br>IYSDPR               | 1          | 1                | 1                        | F1LPD0        |                               | 0,0000  | 0     | 0,4      | 22        | 0,054893 | 3        | 1737,91770 | 0,36     | 32,97              | 0 |
| F1M0B2 | Protein LOC683295 (Fragment)<br>OS=Rattus norvegicus<br>GN=LOC683295<br>PE=4<br>SV=2 - [F1M0B2_RAT] | 151,87                            | 4,11       | 2                | 2                        | 2             | 2                             | 535     | 57,7  | 7,88     |           |          |          |            |          |                    |   |
| A2     | Sequence                                                                                            | # PSMs                            | # Proteins | # Protein Groups | Protein Group Accessions | Modifications | ΔCn                           | q-Value | PEP   | IonScore | Exp Value | Charge   | MH+ [Da] | ΔM [ppm]   | RT [min] | # Missed Cleavages |   |
|        | High                                                                                                | SLDLDSIIAEVK                      | 1          | 2                | 1                        | F1M0B2        |                               | 0,0000  | 0     | 0,03     | 97        | 1,95E-09 | 2        | 1302,71538 | 0,14     | 36,03              | 0 |
|        | High                                                                                                | YEELQITAGR                        | 1          | 2                | 1                        | F1M0B2        |                               | 0,0000  | 0     | 0,04     | 78        | 1,79E-07 | 2        | 1179,60124 | 0,65     | 21,61              | 0 |
| G3V763 | Collagen alpha-1(V) chain<br>OS=Rattus norvegicus<br>GN=Col5a1<br>PE=4<br>SV=2 - [G3V763_RAT]       | 135,61                            | 2,44       | 2                | 2                        | 2             | 3                             | 1636    | 161,7 | 4,83     |           |          |          |            |          |                    |   |
| A2     | Sequence                                                                                            | # PSMs                            | # Proteins | # Protein Groups | Protein Group Accessions | Modifications | ΔCn                           | q-Value | PEP   | IonScore | Exp Value | Charge   | MH+ [Da] | ΔM [ppm]   | RT [min] | # Missed Cleavages |   |
|        | High                                                                                                | GPmVSAQE<br>SQAQAILQ<br>QAR       | 2          | 2                | 1                        | G3V763        | M3(Oxidation)                 | 0,0000  | 0     | 0,07     | 89        | 1,22E-08 | 2        | 2029,02324 | 4,94     | 25,86              | 0 |



|                |                                                                                                                      |                          |        |            |                     |                                |                   |        |         |      |          |           |        |            |          |          |                       |
|----------------|----------------------------------------------------------------------------------------------------------------------|--------------------------|--------|------------|---------------------|--------------------------------|-------------------|--------|---------|------|----------|-----------|--------|------------|----------|----------|-----------------------|
|                | High                                                                                                                 | ILDDEIFEG<br>DIQQLLVSDHR | 1      | 2          | 1                   | G3V763                         |                   | 0,0000 | 0       | 0,45 | 35       | 0,00222   | 3      | 2502,26163 | 4,16     | 41,27    | 0                     |
| Q6I<br>FW6     | Keratin,<br>type I<br>cytoskeletal<br>10<br>OS=Rattus<br>norvegicus<br>GN=Krt10<br>PE=3<br>SV=1 -<br>[K1C10_R<br>AT] | 116,13                   | 7,98   | 1          | 5                   | 5                              | 5                 | 526    | 56,5    | 5,15 |          |           |        |            |          |          |                       |
|                | A2                                                                                                                   | Sequence                 | # PSMs | # Proteins | # Protein<br>Groups | Protein<br>Group<br>Accessions | Modificatio<br>ns | ΔCn    | q-Value | PEP  | IonScore | Exp Value | Charge | MH+ [Da]   | ΔM [ppm] | RT [min] | # Missed<br>Cleavages |
|                | High                                                                                                                 | QSLEASLAE<br>TEGR        | 1      | 1          | 1                   | Q6IFW6                         |                   | 0,0000 | 0       | 0,17 | 99       | 1,32E-09  | 2      | 1390,68181 | 0,63     | 22,76    | 0                     |
|                | High                                                                                                                 | LKYENEVAL<br>R           | 1      | 1          | 1                   | Q6IFW6                         |                   | 0,0000 | 0       | 0,41 | 31       | 0,008502  | 3      | 1234,67987 | 0,66     | 19,10    | 1                     |
|                | High                                                                                                                 | LAADDFR                  | 1      | 1          | 1                   | Q6IFW6                         |                   | 0,0000 | 0       | 0,29 | 24       | 0,057384  | 2      | 807,39958  | -0,01    | 18,66    | 0                     |
|                | High                                                                                                                 | QSVEADIN<br>GLR          | 1      | 1          | 1                   | Q6IFW6                         |                   | 0,0000 | 0       | 0,41 | 23       | 0,045462  | 2      | 1201,61858 | 1,15     | 22,70    | 0                     |
|                | High                                                                                                                 | QSVEADIN<br>GLRR         | 1      | 1          | 1                   | Q6IFW6                         |                   | 0,0000 | 0       | 0,29 | 19       | 0,163225  | 3      | 1357,71933 | 0,75     | 20,66    | 1                     |
| Q6I<br>MF3     | Keratin,<br>type II<br>cytoskeletal<br>1<br>OS=Rattus<br>norvegicus<br>GN=Krt1<br>PE=2<br>SV=1 -<br>[K2C1_RA<br>T]   | 114,80                   | 5,76   | 1          | 3                   | 3                              | 3                 | 625    | 64,8    | 7,87 |          |           |        |            |          |          |                       |
|                | A2                                                                                                                   | Sequence                 | # PSMs | # Proteins | # Protein<br>Groups | Protein<br>Group<br>Accessions | Modificatio<br>ns | ΔCn    | q-Value | PEP  | IonScore | Exp Value | Charge | MH+ [Da]   | ΔM [ppm] | RT [min] | # Missed<br>Cleavages |
|                | High                                                                                                                 | FLEQQNQV<br>LQTK         | 1      | 1          | 1                   | Q6IMF3                         |                   | 0,0000 | 0       | 0,12 | 65       | 3,34E-06  | 2      | 1475,78728 | 1,33     | 21,71    | 0                     |
|                | High                                                                                                                 | WELLQQVD<br>TSTR         | 1      | 1          | 1                   | Q6IMF3                         |                   | 0,0000 | 0       | 0,06 | 63       | 6,21E-06  | 2      | 1475,75066 | 1,16     | 29,02    | 0                     |
|                | High                                                                                                                 | TNAENEFV<br>TIKK         | 1      | 1          | 1                   | Q6IMF3                         |                   | 0,0000 | 0       | 0,24 | 25       | 0,027418  | 3      | 1393,72913 | -2,23    | 19,13    | 1                     |
| Q9<br>WV<br>H8 | Fibulin-5<br>OS=Rattus<br>norvegicus<br>GN=Fbln5<br>PE=2<br>SV=1 -                                                   | 86,76                    | 4,46   | 1          | 2                   | 2                              | 3                 | 448    | 50,1    | 4,67 |          |           |        |            |          |          |                       |

| [FBLN5_RAT] |                                                                                                          |        |            |                  |                          |                |             |         |       |          |           |        |            |                  |          |                    |
|-------------|----------------------------------------------------------------------------------------------------------|--------|------------|------------------|--------------------------|----------------|-------------|---------|-------|----------|-----------|--------|------------|------------------|----------|--------------------|
| A2          | Sequence                                                                                                 | # PSMs | # Proteins | # Protein Groups | Protein Group Accessions | Modifications  | $\Delta Cn$ | q-Value | PEP   | IonScore | Exp Value | Charge | MH+ [Da]   | $\Delta M$ [ppm] | RT [min] | # Missed Cleavages |
| High        | YPGAYYIFQIK                                                                                              | 2      | 1          | 1                | Q9WVH8                   |                | 0,0000      | 0       | 0,09  | 52       | 6,13E-05  | 2      | 1362,70976 | 0,36             | 32,45    | 0                  |
| High        | DQPFTILFR                                                                                                | 1      | 1          | 1                | Q9WVH8                   |                | 0,0000      | 0       | 0,46  | 29       | 0,012694  | 2      | 1136,60979 | -0,12            | 34,57    | 0                  |
| F1LR02      | Procollagen, type XVIII, alpha 1, isoform CRA_a OS=Rattus norvegicus GN=Col18a1 PE=4 SV=2 - [F1LR02_RAT] | 72,57  | 3,43       | 1                | 2                        | 2              | 2           | 1311    | 134,6 | 6,29     |           |        |            |                  |          |                    |
| A2          | Sequence                                                                                                 | # PSMs | # Proteins | # Protein Groups | Protein Group Accessions | Modifications  | $\Delta Cn$ | q-Value | PEP   | IonScore | Exp Value | Charge | MH+ [Da]   | $\Delta M$ [ppm] | RT [min] | # Missed Cleavages |
| High        | ISQVEDPHVGLAYVFGPYSK                                                                                     | 1      | 1          | 1                | F1LR02                   |                | 0,0000      | 0       | 0,06  | 51       | 6,49E-05  | 3      | 2206,11838 | 0,19             | 32,22    | 0                  |
| High        | GAGLFVGQAGAADPKFQGmISEL R                                                                                | 1      | 1          | 1                | F1LR02                   | M20(Oxidation) | 0,0000      | 0       | 0,12  | 44       | 0,000388  | 3      | 2551,26505 | 1,55             | 30,45    | 1                  |
| F1LST1      | Fibronectin OS=Rattus norvegicus GN=Fn1 PE=4 SV=2 - [F1LST1_RAT]                                         | 85,80  | 3,14       | 6                | 3                        | 3              | 4           | 1848    | 202,4 | 5,39     |           |        |            |                  |          |                    |
| A2          | Sequence                                                                                                 | # PSMs | # Proteins | # Protein Groups | Protein Group Accessions | Modifications  | $\Delta Cn$ | q-Value | PEP   | IonScore | Exp Value | Charge | MH+ [Da]   | $\Delta M$ [ppm] | RT [min] | # Missed Cleavages |
| High        | NTFAEVTGLSPGVTYLFK                                                                                       | 2      | 6          | 1                | F1LST1                   |                | 0,0000      | 0       | 0,13  | 59       | 9,69E-06  | 2      | 1944,01323 | 0,95             | 36,71    | 0                  |
| High        | LGVRPSQGEAPR                                                                                             | 1      | 6          | 1                | F1LST1                   |                | 0,0000      | 0       | 0,23  | 21       | 0,055695  | 3      | 1323,71234 | -0,38            | 14,78    | 0                  |

|            |                                                                                                                  |                                         |        |            |                  |                          |                     |        |         |      |          |           |        |                |          |          |                    |
|------------|------------------------------------------------------------------------------------------------------------------|-----------------------------------------|--------|------------|------------------|--------------------------|---------------------|--------|---------|------|----------|-----------|--------|----------------|----------|----------|--------------------|
|            | High                                                                                                             | TGLDSPTG<br>FDSSDVTA<br>NSFTVHWV<br>APR | 1      | 6          | 1                | F1LST1                   |                     | 0,0000 | 0       | 0,45 | 10       | 0,601645  | 3      | 2864,3446<br>4 | -1,42    | 32,99    | 0                  |
| F1L<br>NH3 | Procollagen, type VI, alpha 2, isoform CRA_a<br>OS=Rattus norvegicus<br>GN=Col6a2<br>PE=4<br>SV=2 - [F1LNH3_RAT] | 34,71                                   | 2,53   | 1          | 2                | 2                        | 2                   | 1027   | 109,6   | 6,61 |          |           |        |                |          |          |                    |
|            | A2                                                                                                               | Sequence                                | # PSMs | # Proteins | # Protein Groups | Protein Group Accessions | Modifications       | ΔCn    | q-Value | PEP  | IonScore | Exp Value | Charge | MH+ [Da]       | ΔM [ppm] | RT [min] | # Missed Cleavages |
|            | High                                                                                                             | VFAVVITD<br>GR                          | 1      | 1          | 1                | F1LNH3                   |                     | 0,0000 | 0       | 0,31 | 35       | 0,002366  | 2      | 1076,6099<br>1 | -0,02    | 25,31    | 0                  |
|            | High                                                                                                             | VGVVQYSH<br>EGTFEAIR                    | 1      | 1          | 1                | F1LNH3                   |                     | 0,0000 | 0       | 0,37 | 17       | 0,186818  | 3      | 1791,9017<br>7 | -0,40    | 23,54    | 0                  |
| D4A<br>9H2 | Dermatopontin (Predicted), isoform CRA_c<br>OS=Rattus norvegicus<br>GN=Dpt<br>PE=4<br>SV=1 - [D4A9H2_RAT]        | 54,82                                   | 18,07  | 2          | 2                | 2                        | 2                   | 166    | 20,0    | 5,15 |          |           |        |                |          |          |                    |
|            | A2                                                                                                               | Sequence                                | # PSMs | # Proteins | # Protein Groups | Protein Group Accessions | Modifications       | ΔCn    | q-Value | PEP  | IonScore | Exp Value | Charge | MH+ [Da]       | ΔM [ppm] | RT [min] | # Missed Cleavages |
|            | High                                                                                                             | cSNNGLVA<br>GFQSR                       | 1      | 2          | 1                | D4A9H2                   | C1(Carbamidomethyl) | 0,0000 | 0       | 0,14 | 41       | 0,000712  | 2      | 1409,6592<br>3 | 0,10     | 21,55    | 0                  |
|            | High                                                                                                             | QGFSYQcP<br>HGQVVAVR                    | 1      | 2          | 1                | D4A9H2                   | C7(Carbamidomethyl) | 0,0000 | 0       | 0,28 | 34       | 0,00413   | 3      | 1931,9553<br>0 | 0,39     | 23,38    | 0                  |

Legend: Protein ID: protein identifier; PSM: peptide-spectrum matching; MW: molecular weight; Calc. pI: calculated isoelectric point.
